# Supplementary material for: Elucidating electrochemical CO2 reduction reaction processes on Cu(hkl) single-crystal surfaces by in situ Raman spectroscopy
Source: Royal Society of Chemistry journal article supplement (doi:10.1039/d2ee01334g), 2022-01-01
Supplement: d2ee01334g1.pdf [file d2ee01334g1.pdf]

## Supplementary information

### Elucidating electrochemical CO<sub>2</sub> reduction reaction processes on Cu(*hkl*) single-crystal surfaces by *in situ* Raman spectroscopy

Yu Zhao,<sup>‡a</sup> Xia-Guang Zhang,<sup>‡b</sup> Nataraju Bodappa,<sup>‡a</sup> Wei-Min Yang,<sup>a</sup> Qian Liang,<sup>a</sup> Petar M. Radjenovica,<sup>a</sup> Yao-Hui Wang,<sup>a</sup> Yue-Jiao Zhang,<sup>ac</sup> Jin-Chao Dong,<sup>\*ac</sup> Zhong-Qun Tian<sup>ac</sup> and Jian-Feng Li<sup>\*acd</sup>

<sup>a</sup> State Key Laboratory of Physical Chemistry of Solid Surfaces, iChEM, College of Chemistry and Chemical Engineering, College of Energy, College of Physical Science and Technology, Xiamen University, Xiamen 361005, China.

<sup>b</sup> Key Laboratory of Green Chemical Media and Reactions, Ministry of Education, Collaborative Innovation Center of Henan Province for Green Manufacturing of Fine Chemicals, College of Chemistry and Chemical Engineering, Henan Normal University, Xinxiang 453007, China

<sup>c</sup> Innovation Laboratory for Sciences and Technologies of Energy Materials of Fujian Province (IKKEM), Xiamen 361005, China.

<sup>d</sup> College of Optical and Electronic Technology, China Jiliang University, Hangzhou 310018, China.

<sup>‡</sup> These authors contributed equally.

## Supplementary Methods

### Chemicals

Chloroauric acid ( $\text{HAuCl}_4$ ) (99.99%), (3-aminopropyl) trimethoxysilane (APTMS) (97%), sodium citrate (99.0%) and ethylene glycol (>99.0%) were purchased from Alfa-Aesar;  $\text{H}_2\text{SO}_4$  (95%),  $\text{H}_3\text{PO}_4$  (85%), and Acetic acid (99%) were purchased from Sinopharm; silicate solution (27%  $\text{SiO}_2$ ) were purchased from Sigma-Aldrich. potassium hydroxide (99.99%) was purchased from Aladdin.  $\text{KHCO}_3$  ( $\geq 99.99\%$ ),  $\text{KOH}$  (99.99%) were purchased from Aladdin.  $\text{KClO}_4$  (99.9%) and  $\text{D}_2\text{O}$  (for NMR atom % 99.9 D) were purchased from Innochem. Argon (99.999%),  $^{12}\text{CO}_2$  (99.99%),  $^{13}\text{CO}_2$ , and  $^{12}\text{CO}$  (99.9%) was purchased from Linde.  $\text{CO}_2$  saturated  $\text{KHCO}_3$  electrolyte was prepared by purging  $\text{CO}_2$  into  $\text{KOH}$  for 20 min. Milli Q water (18.2  $\text{M}\Omega\cdot\text{cm}$ ) was used throughout the experiment.

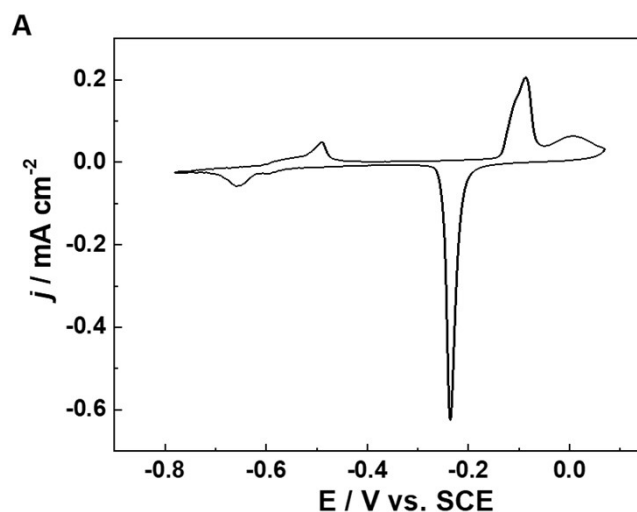

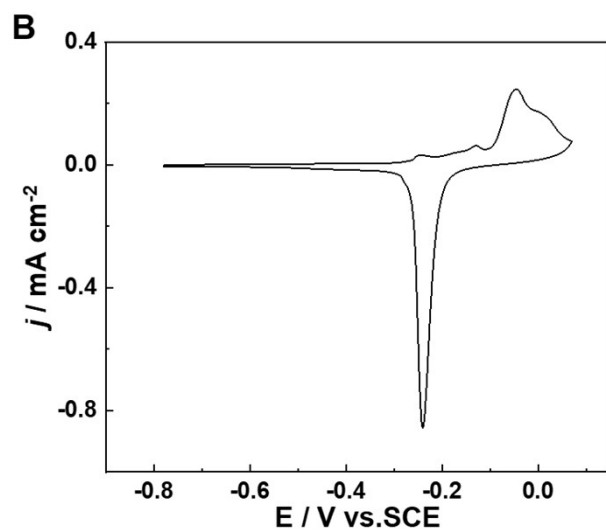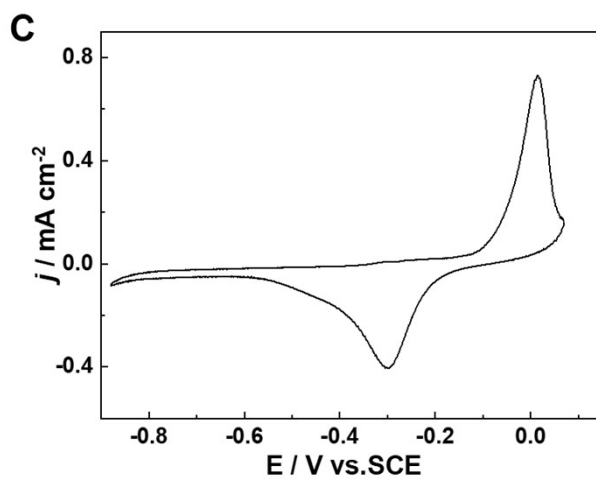

**Fig. S1. Electrochemical characterization of Cu(*hkl*) and Cu(poly) electrodes.** CVs of Cu(111) (A), Cu(110) (B) single crystals and Cu(poly) (C) surfaces in 0.1 M KOH saturated with argon,  $\nu = 0.05 \text{ V s}^{-1}$ .

The electrochemical behaviors of Cu(111), Cu(110) and Cu(poly) were tested by CV in 0.1 M KOH solution (Fig. S1). Compared with the literature<sup>1</sup>, it was determined that the properties of the single crystal used in the experiment were relatively intact.

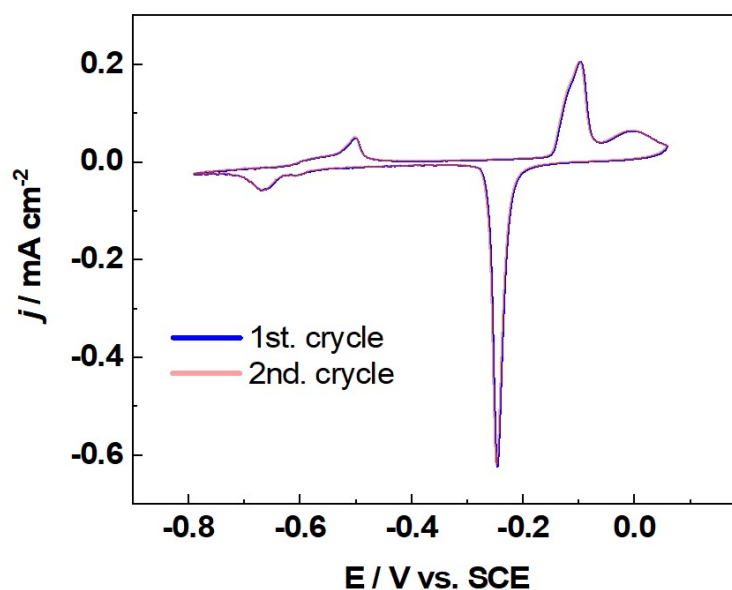

1

2 **Fig. S2. Investigation on the stability of Cu(111) surface structure.** First and second cycles of  
 3 CV of Cu(111) single crystal surfaces in 0.1 M KOH saturated with argon,  $v = 0.05 \text{ V s}^{-1}$ .

4

5 The electrochemical behavior of the first and second cycles of Cu(111) surface in 0.1 M KOH  
 6 solution is consistent, which proves that the performance of Cu(111) can be maintained after the  
 7 redox process.

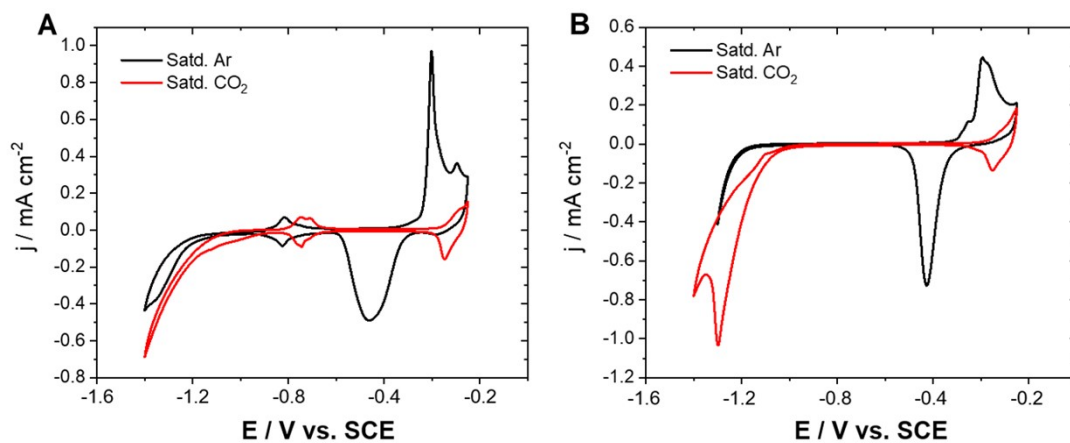

8

9 **Fig. S3. The control experiment of Cu(*hkl*) in argon and CO<sub>2</sub> atmosphere, respectively.** CVs  
 10 of (A) Cu(111) and (B) Cu(110) in 0.1 M KHCO<sub>3</sub> saturated with Ar (black curve) and saturated  
 11 with CO<sub>2</sub> (red curve),  $v = 0.05 \text{ V s}^{-1}$ .

12

13 In **Fig. S3**, we found that the electrochemical peak of Cu-oxygen species on the Cu(*hkl*) surface

1 at -0.4 V was obviously suppressed by the presence of CO<sub>2</sub> in the 0.1 M KHCO<sub>3</sub> solution (sat. Ar),  
 2 indicating that CO<sub>2</sub> was adsorbed on the Cu(*hkl*) surface at this potential.

3

4

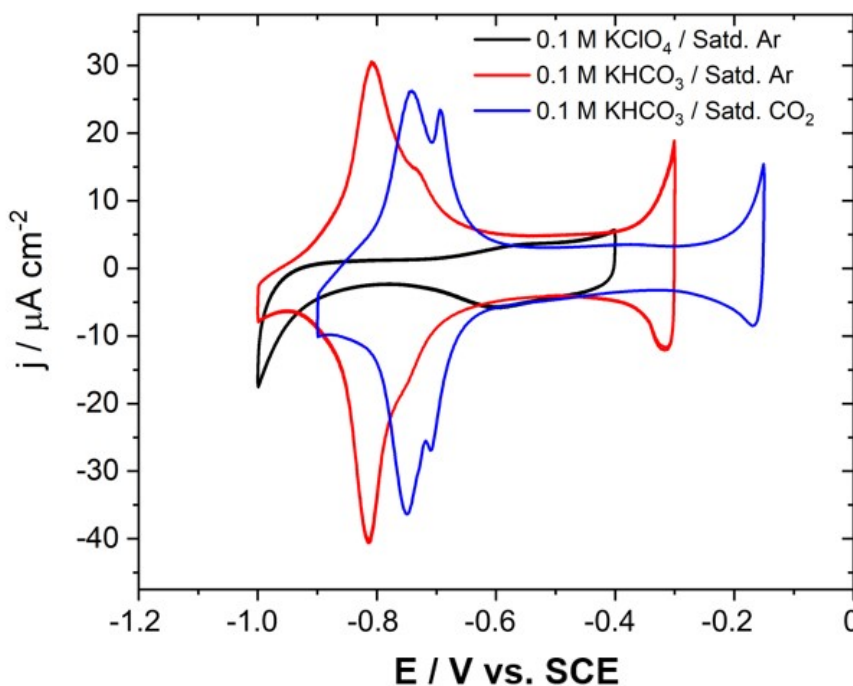

5

6 **Fig. S4. CVs of Cu(111) in different solution.** CVs of Cu(111) in 0.1 M KClO<sub>4</sub> saturated with Ar  
 7 (black curve), 0.1 M KHCO<sub>3</sub> saturated with Ar (red curve) and 0.1 M KHCO<sub>3</sub> saturated with CO<sub>2</sub>  
 8 (blue curve),  $\nu = 0.05 \text{ V s}^{-1}$ .

9 Control CVs of Cu(111) were carried out in different solutions as shown in **Fig. S4**, the broad CV  
 10 feature peak around -0.8 V remains the same in Ar sat. 0.1 M KHCO<sub>3</sub>, but this feature was absent  
 11 in Ar sat. 0.1 M KClO<sub>4</sub> solution. These results reveal that the peaks around -0.8 V should arise from  
 12 the HCO<sub>3</sub><sup>-</sup> or CO<sub>2</sub> interaction with the Cu(111) surface.

13

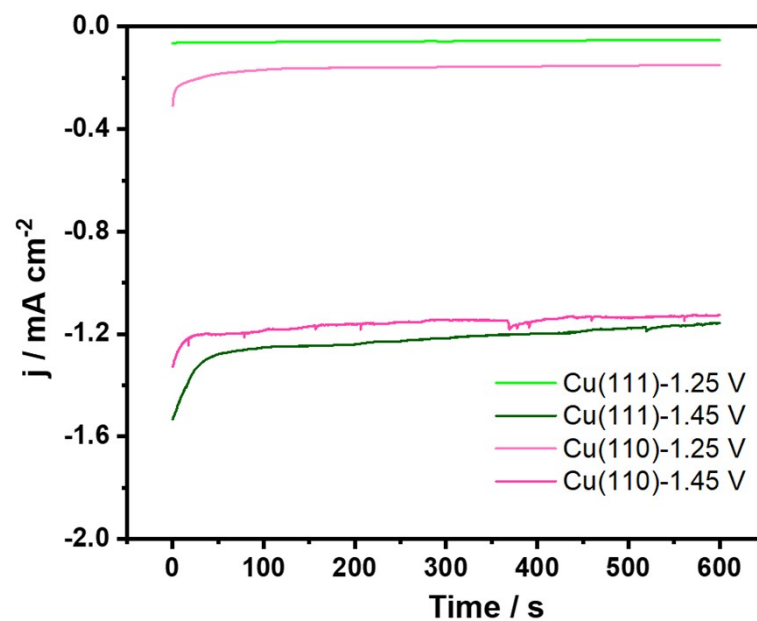

1  
2 **Fig. S5. i-t curves of Cu(111) and Cu(110)** Chronoamperometric curves of Cu(111) and Cu(110)  
3 single crystals at various potentials.

4

5

6

# 1 *In situ* Raman of CO<sub>2</sub>RR on the Cu(hkl) and Spectral peak attribution

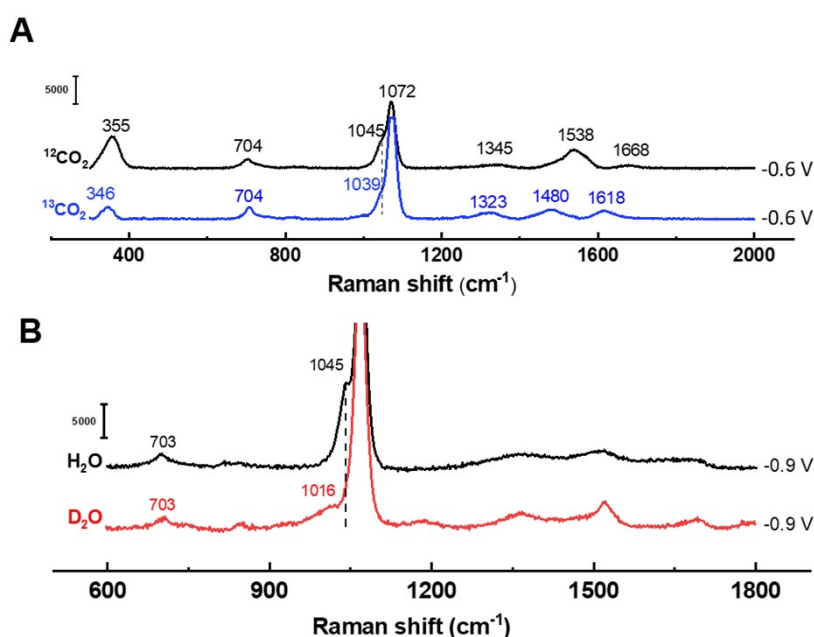

2

3 **Fig. S6. The isotope experiments of \*CO<sub>2</sub><sup>-</sup> and \*COOH species.** Comparison of *in situ* SERS  
 4 spectra of CO<sub>2</sub>RR on Cu(poly) at -0.6 V(a) and -0.9 V(b) in 0.5 M KHCO<sub>3</sub>/satd. CO<sub>2</sub> (black curve);  
 5 0.5 M NaH<sup>13</sup>CO<sub>3</sub>/bubbling <sup>13</sup>CO<sub>2</sub> (blue curve); 0.5 M K<sub>2</sub>CO<sub>3</sub>/CO<sub>2</sub>/D<sub>2</sub>O (red curve).

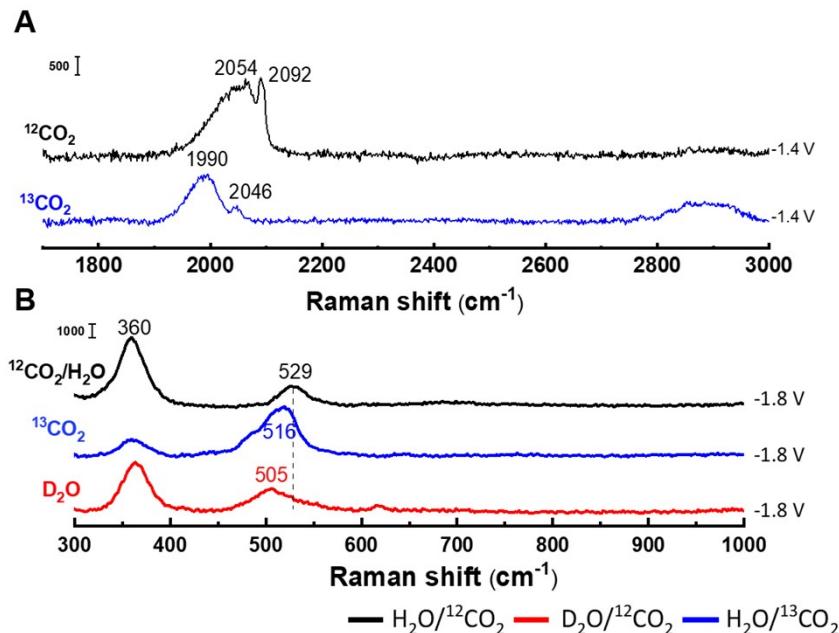

6

7 **Fig. S7. The isotope experiments of \*CO, \*OCCO and \*CH<sub>2</sub>CHO species.** comparison of *in situ*  
 8 SERS spectra of CO<sub>2</sub>RR on Cu(poly) at -1.4 V(A) and -1.8 V(B) in 0.5 M KHCO<sub>3</sub>/sat. CO<sub>2</sub> (black  
 9 curve); 0.5 M NaH<sup>13</sup>CO<sub>3</sub> bubbling <sup>13</sup>CO<sub>2</sub> (blue curve); 0.5 M K<sub>2</sub>CO<sub>3</sub>/CO<sub>2</sub>/D<sub>2</sub>O (red curve).

10

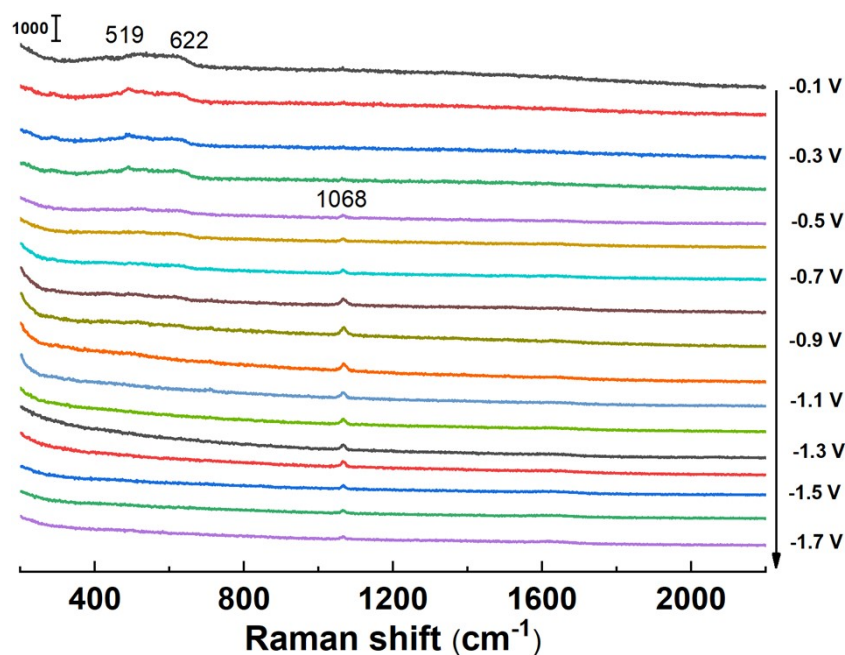

**Fig. S8. The control experiment of  $\text{K}_2\text{CO}_3$  solution.** In situ SERS spectra of Cu(poly) in 0.8 M  $\text{K}_2\text{CO}_3$  solution without  $\text{CO}_2$ .

To investigate the adsorption of  $\text{CO}_3^{2-}$  on the copper electrode surface, we investigated the electrochemical process of the Cu electrode surface in 0.8 M  $\text{K}_2\text{CO}_3$  solution (Fig. S8). Except for the Raman peaks of  $\text{Cu}_2\text{O}$  around  $519\text{ cm}^{-1}$  and  $622\text{ cm}^{-1}$  and the Raman peak of  $\text{CO}_3^{2-}$  at  $1068\text{ cm}^{-1}$  appeared, no other obvious Raman peak around  $1554\text{ cm}^{-1}$  was observed.

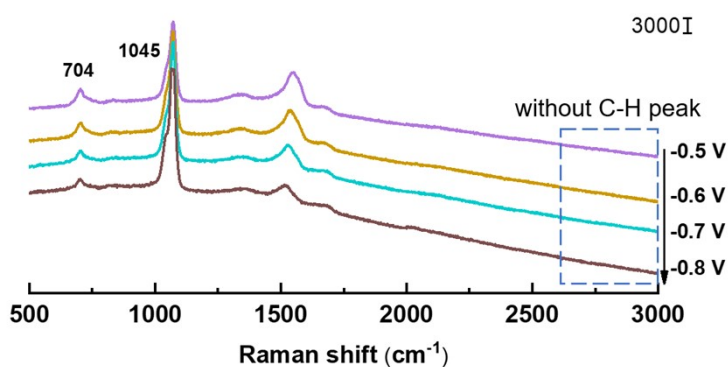

**Fig. S9. The low and high wavenumber spectral of  $\text{CO}_2\text{RR}$  on Cu(poly) surface.** In situ SERS of Cu(poly) in 0.5 M  $\text{KHCO}_3$  solution sat.  $\text{CO}_2$ .



1 The in-situ Raman spectral results of CO<sub>2</sub>RR on the Cu(poly) electrode surface show that no obvious  
 2 C-H stretching vibration peak information is observed at high wavenumber (Fig. S9), which  
 3 indicates that the 1045 cm<sup>-1</sup> peak should not be attributed to the HCOO species.

4

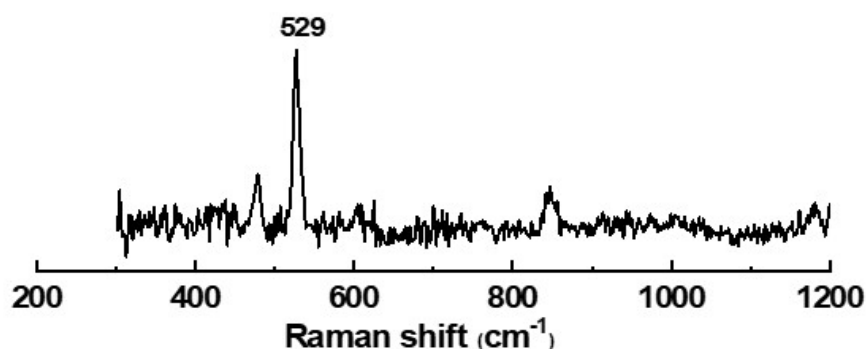

5

6 **Fig. S10. The Raman spectra of CH<sub>3</sub>CHO.** Raman spectra of 10% acetaldehyde acid sample.

7

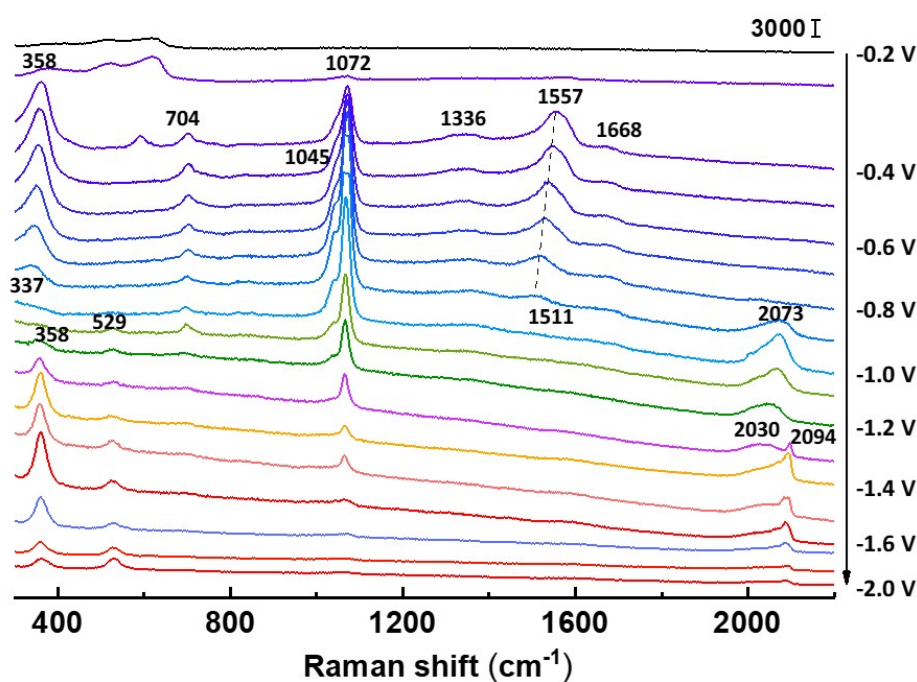

8

9 **Fig. S11. In situ Raman spectra of CO<sub>2</sub>RR reaction on Cu(poly).** *In situ* SERS spectra of  
 10 Cu(poly) in 0.5 M KHCO<sub>3</sub> saturated with CO<sub>2</sub>. pH = 6.8 (vs. SCE).

11 In order to accurately identify the attribution of the spectral Raman peaks of the CO<sub>2</sub>RR-related  
 12 intermediate species, and the results on Cu (poly) are similar to those on Cu(110) surface(Fig. S11),  
 13 we conducted a systematic isotope substitution experiment on Cu (poly) surface during the CO<sub>2</sub>RR

1 process. To compare the offset of relative Raman peak in  $^{13}\text{C}$  and  $\text{D}_2\text{O}$  experiments more accurately,  
 2 we have selected different potentials for comparison as shown in Fig. S5-6. We found that the peak  
 3  $\sim 355\text{ cm}^{-1}$  shifts to around  $346\text{ cm}^{-1}$  in  $^{13}\text{C}$  experiment. Thus, this peak should be correlated with  
 4 the “C” atom. The peak  $\sim 1045\text{ cm}^{-1}$  shifts to around  $1039\text{ cm}^{-1}$  and  $1016\text{ cm}^{-1}$  in  $^{13}\text{C}$  and  $\text{D}_2\text{O}$   
 5 experiments, respectively. So Thus, this peak should be correlated with “C” and “H” atoms. The  
 6 peak of  $1345\text{ cm}^{-1}$ ,  $1538\text{ cm}^{-1}$  and  $1668\text{ cm}^{-1}$  shift to lower wavenumber around  $1323\text{ cm}^{-1}$ ,  $1480$   
 7  $\text{cm}^{-1}$  and  $1618\text{ cm}^{-1}$  in  $^{13}\text{CO}_2$ , respectively. The peak of  $2054\text{ cm}^{-1}$  and  $2092\text{ cm}^{-1}$  shift to  $1990\text{ cm}^{-1}$   
 8 and  $2046\text{ cm}^{-1}$  respectively. The peak of  $529\text{ cm}^{-1}$  shift to lower wavenumber in both  $\text{D}_2\text{O}$  and  $^{13}\text{CO}_2$ .  
 9  
 10

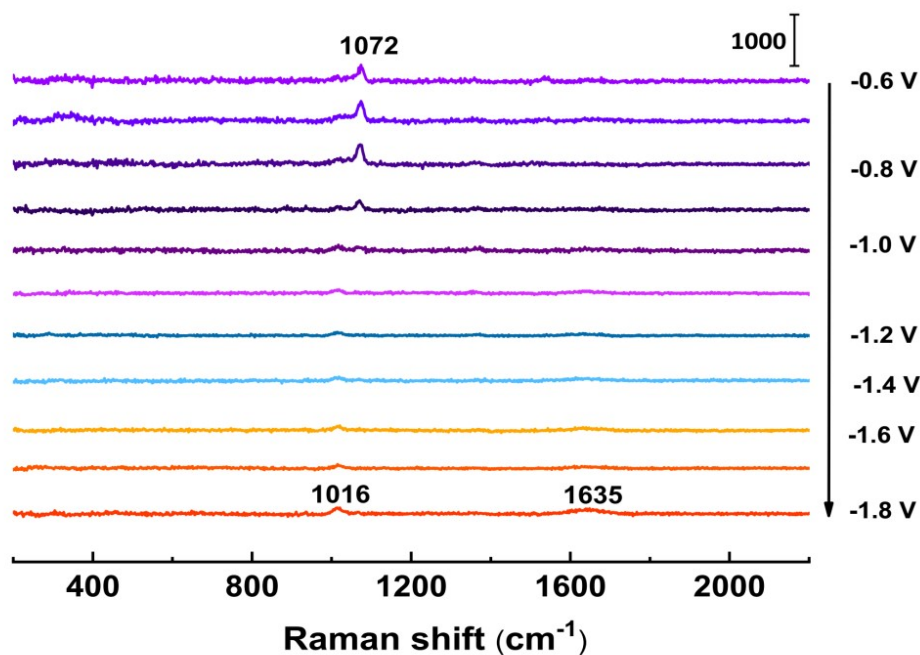

11  
 12 **Fig. S12. In situ Raman spectra of  $\text{CO}_2\text{RR}$  process on Cu surface.** In situ Raman spectra of  
 13 Cu(poly) in  $0.5\text{ M KHCO}_3/\text{H}_2\text{O}$  (sat.  $\text{CO}_2$ ) without  $\text{Cu}_2\text{O}$  in the initial potential.  
 14  
 15 After we first reduce the Cu(poly) electrode at very negative potential and then conduct *in situ*  
 16 Raman study of the  $\text{CO}_2\text{RR}$  from  $-0.6\text{ V}$  (Fig. S12), no other characteristic Raman peaks appeared  
 17 except for the Raman peaks of  $\text{HCO}_3^-$  and  $\text{CO}_3^{2-}$  around  $1016\text{ cm}^{-1}$  and  $1072\text{ cm}^{-1}$ , indicating that  
 18 the presence of  $\text{Cu}_2\text{O}$  or Cu oxides in the initial potential range has an important effect for activating

1 CO<sub>2</sub> during the CO<sub>2</sub>RR process.

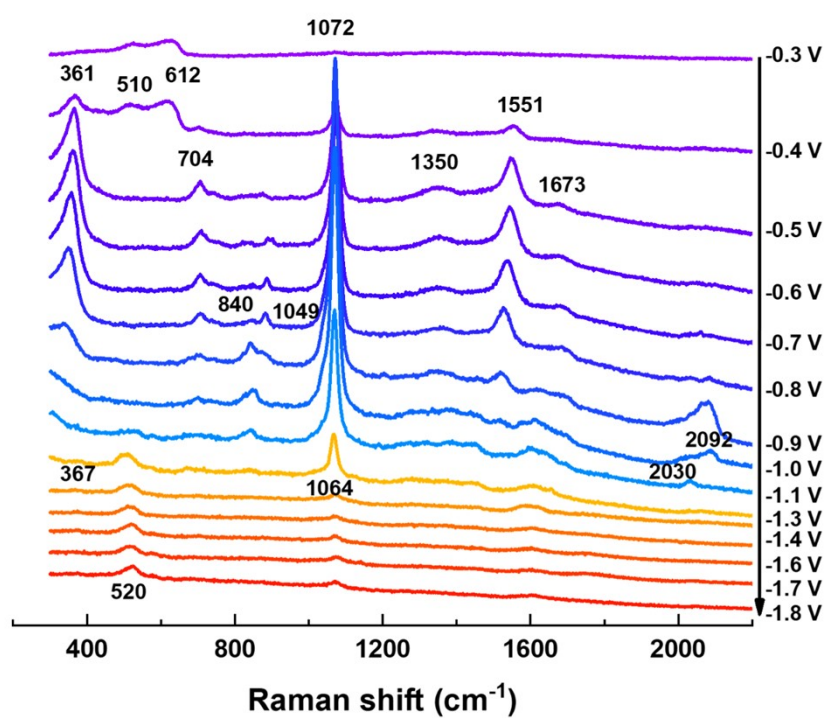

2

3 **Fig. S13** *In situ* Raman spectra of CO<sub>2</sub>RR reaction on Cu(100). *In situ* SHINERS of Cu(100)

4 in 0.5 M KHCO<sub>3</sub> saturated with CO<sub>2</sub>. pH = 6.8 (vs. SCE).

5

6

## 1 Detection of CO<sub>2</sub>RR liquids products

2

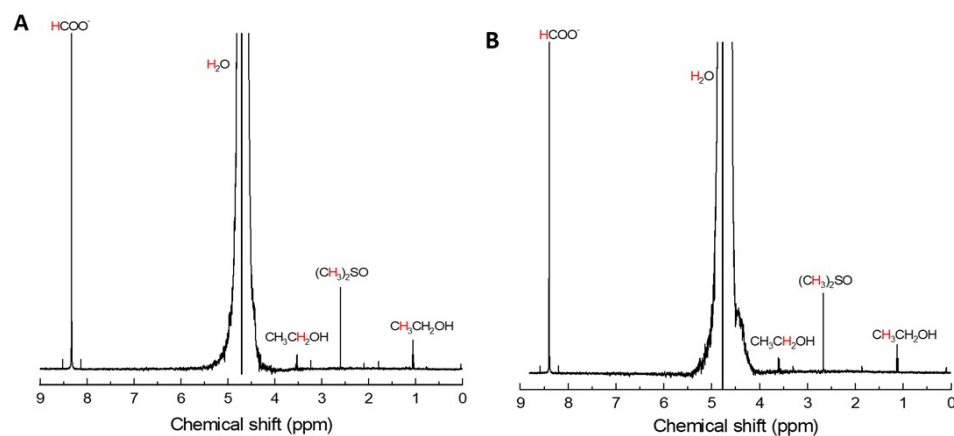

3

4 **Fig. S14. NMR for liquid product analysis.** <sup>1</sup>H NMR spectrum obtained on the Cu(111) (A),  
5 Cu(110) (B) electrode at -1.65 V in 0.5 M KHCO<sub>3</sub> CO<sub>2</sub> saturated for liquid product analysis. DMSO  
6 and phenol were added as internal standards.

# 1 The concentration effect of $\text{KHCO}_3$

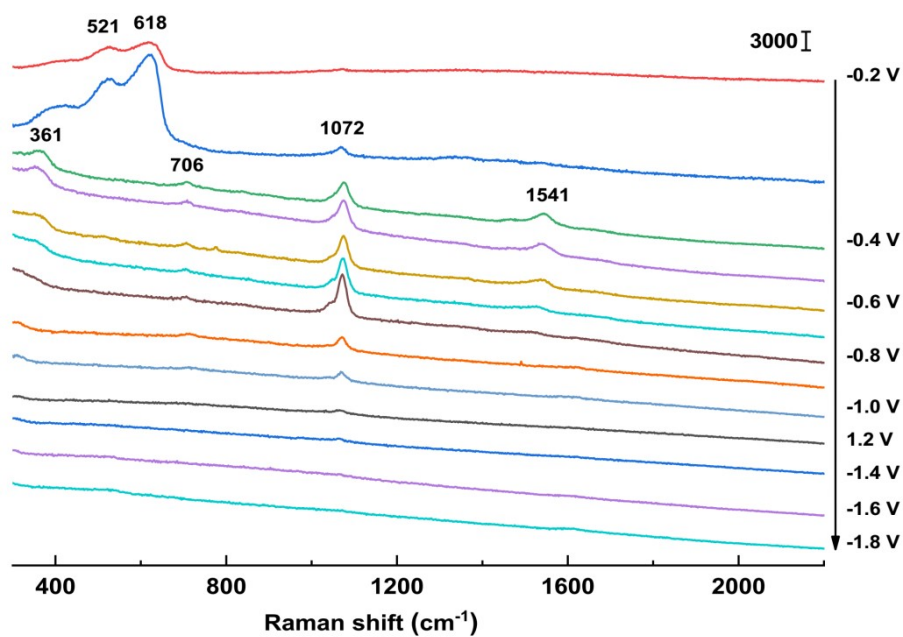

2

3 **Fig. S15.** *In situ* Raman spectra of Cu(poly) in 0.2 M  $\text{KHCO}_3$ . *In situ* SERS spectra of Cu(poly)

4 in 0.2 M  $\text{KHCO}_3/\text{H}_2\text{O}$  without  $\text{CO}_2$  gas.

5

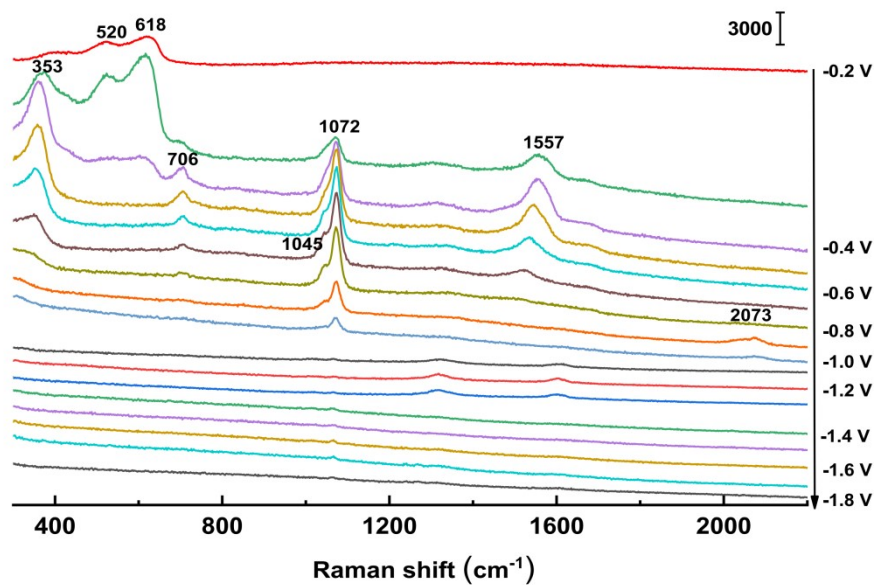

6

7 **Fig. S16.** *In situ* Raman spectra of Cu(poly) in 0.3 M  $\text{KHCO}_3$ . *In situ* SERS spectra of Cu(poly)

8 in 0.3 M  $\text{KHCO}_3/\text{H}_2\text{O}$  without  $\text{CO}_2$  gas.

9

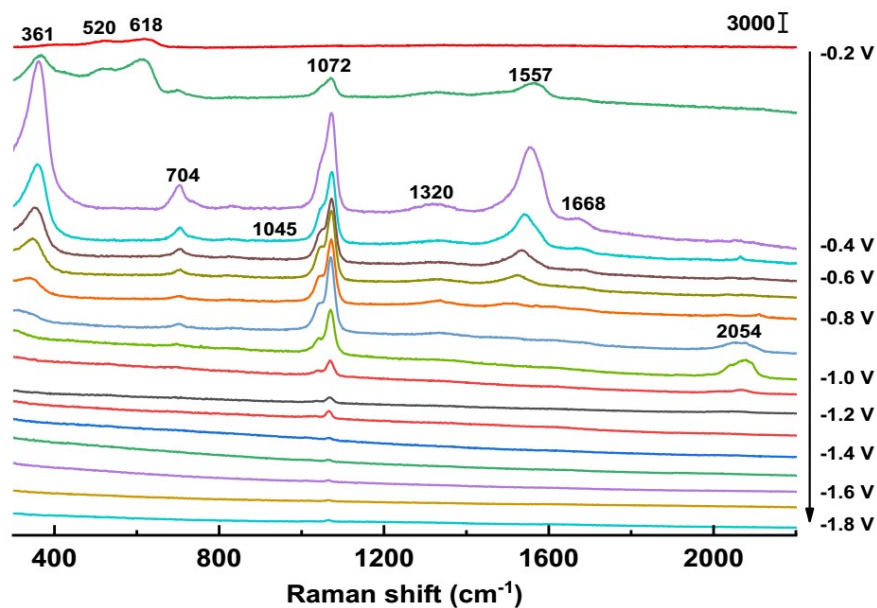

1

2 **Fig. S17.** In situ Raman spectra of Cu(poly) in 0.4 M KHCO<sub>3</sub>. In situ SERS spectra of Cu(poly)

3 in 0.4 M KHCO<sub>3</sub>/H<sub>2</sub>O without CO<sub>2</sub> gas.

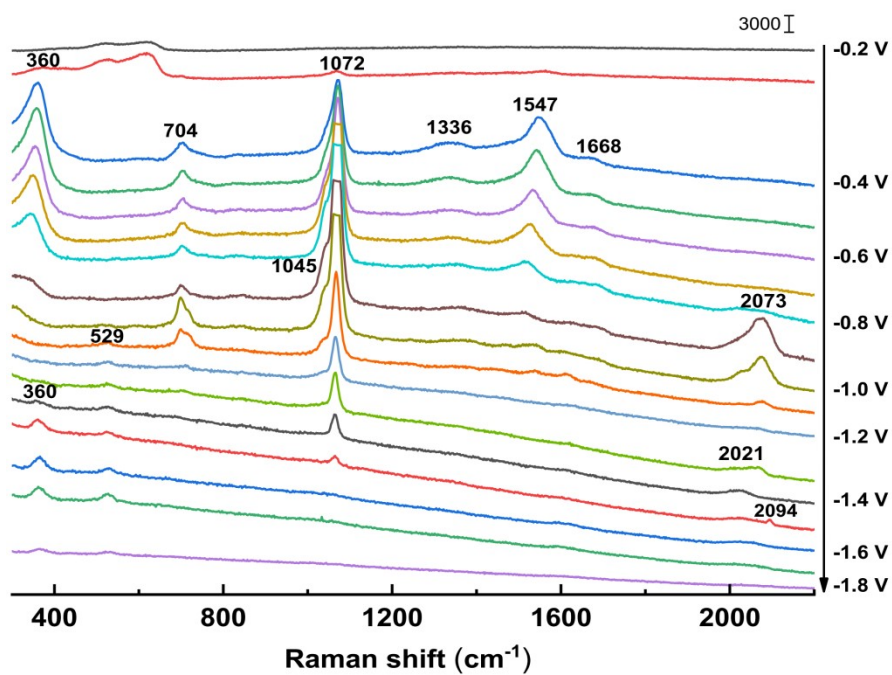

4

5 **Fig. S18.** In situ Raman spectra of Cu(poly) in 0.6 M KHCO<sub>3</sub>. In situ SERS spectra of Cu(poly)

6 in 0.6 M KHCO<sub>3</sub>/H<sub>2</sub>O without CO<sub>2</sub> gas.

7



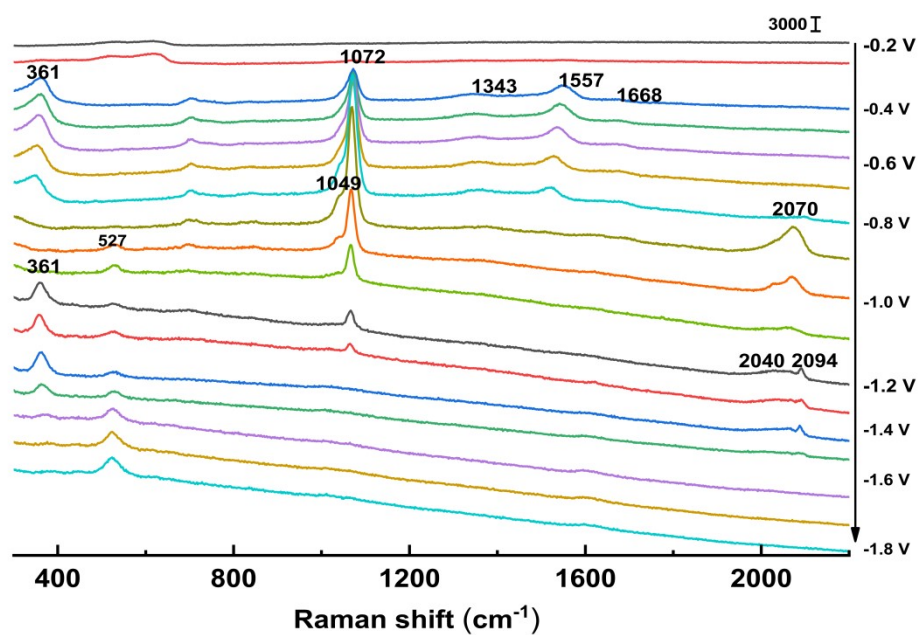

1

2 **Fig. S19.** In situ Raman spectra of Cu(poly) in 0.8 M KHCO<sub>3</sub>. In situ SERS spectra of Cu(poly)  
 3 in 0.8 M KHCO<sub>3</sub>/H<sub>2</sub>O without CO<sub>2</sub> gas.

4

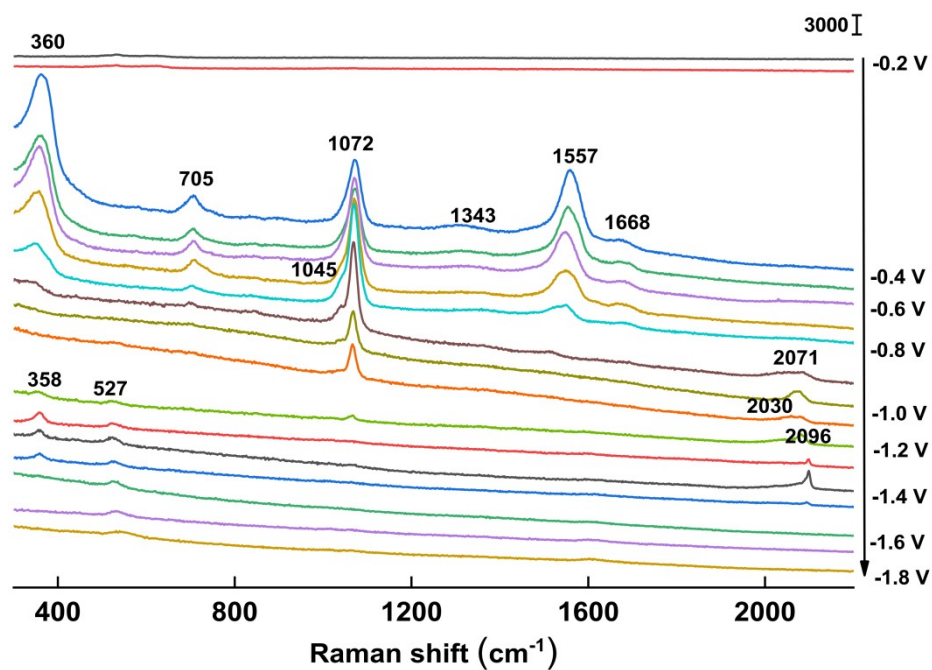

5

6 **Fig. S20.** In situ Raman spectra of Cu(poly) in 1.0 M KHCO<sub>3</sub>. In situ SERS spectra of Cu(poly)  
 7 in 1.0 M KHCO<sub>3</sub>/H<sub>2</sub>O without CO<sub>2</sub> gas.

8

9

10 Results of different concentrations of KHCO<sub>3</sub> on Cu(poly) surface. In order to investigate the

1 concentration effect of the  $\text{KHCO}_3$  electrolyte, we have investigated the reaction process of Cu  
 2 (poly) surface under different concentration conditions. As the concentration increases, we found  
 3 that the characteristic Raman peaks of  $\text{CO}_2\text{RR}$ -related intermediate species gradually become  
 4 apparent. (Fig. S15-S20)

5

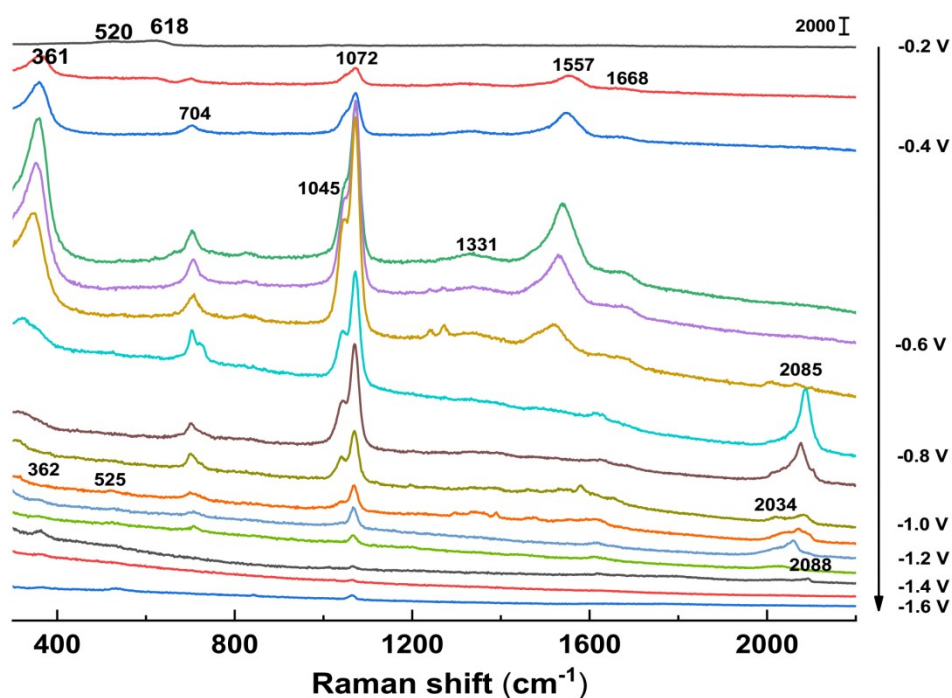

6

7 **Fig. S21. In situ Raman spectra of Cu(poly) in 0.4 M  $\text{KHCO}_3$  solution  $\text{CO}_2$ -saturated.** In situ  
 8 SERS spectra of Cu(poly) in 0.4 M  $\text{KHCO}_3/\text{H}_2\text{O}$  with  $\text{CO}_2$  gas.

9

10 After introduced  $\text{CO}_2$  gas into the 0.4 M  $\text{KHCO}_3$  solution, we found that the peaks of  $\text{CO}_2\text{RR}$  related  
 11 intermediate species became more obvious, and the characteristic peaks of  $^*\text{OCCO}$  ( $2088\text{ cm}^{-1}$ ) and  
 12  $^*\text{CH}_2\text{CHO}$  ( $525\text{ cm}^{-1}$ ) appeared in low potential range.



1 **Computational results:**

2 In this study, different adsorption structures of CO<sub>2</sub>RR intermediates which adsorbs at Cu(*hkl*)  
3 surface have been calculated as following.

4

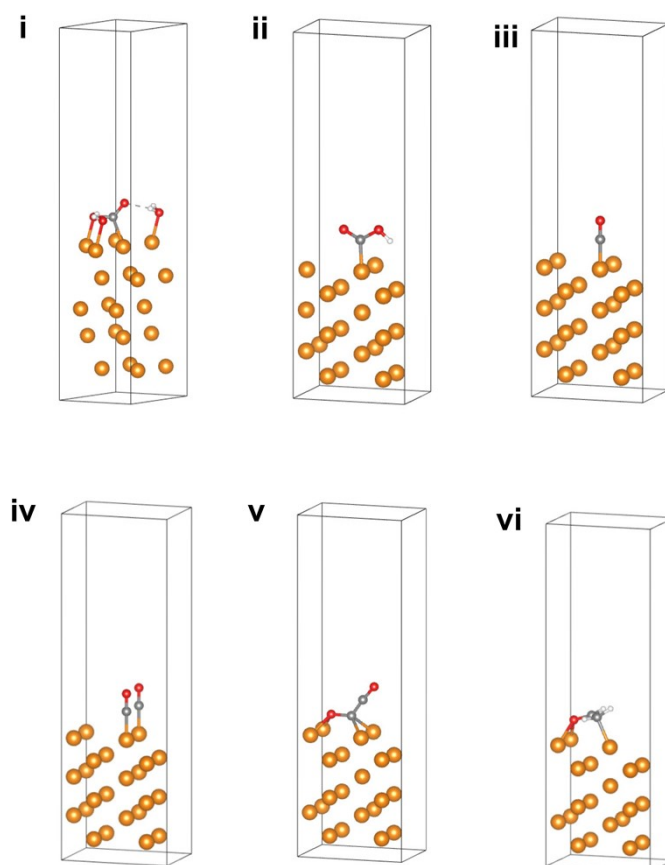

5

6 **Fig. S22. The model of different intermediates at Cu(110) crystal facet.** The side view of  
7 (i)\*CO<sub>2</sub><sup>-</sup>; (ii)\*COOH; (iii)\*CO; (iv) \*CO-\*CO; (v) \*OCCO and (vi) \*CH<sub>2</sub>CHO.

8

9

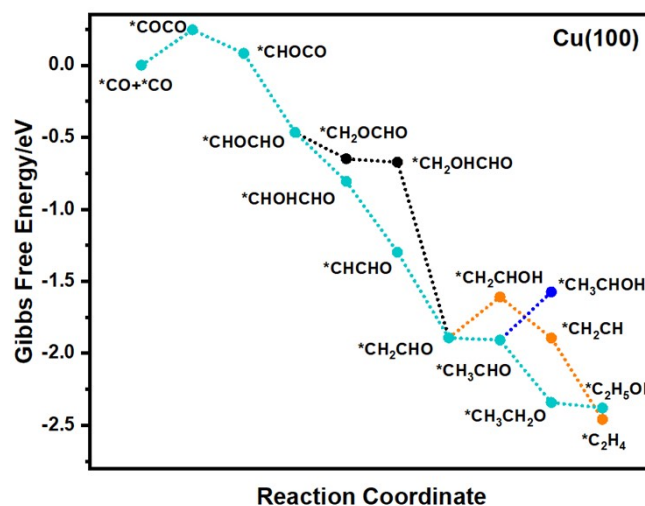

1

2 **Fig. S23. The possible mechanism of CO<sub>2</sub>RR on Cu(100).** The possible mechanism of CO<sub>2</sub>RR  
 3 mechanism to CH<sub>4</sub> on Cu(100) surface and relevant Gibbs free energy of different intermediates.

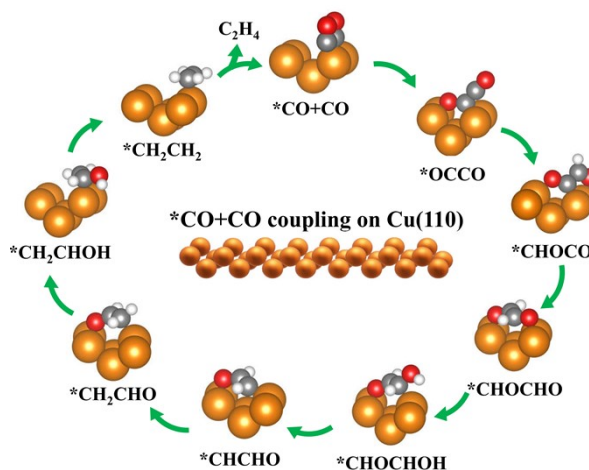

4

5 **Fig. S24. The possible mechanism of \*CO coupling to produce C<sub>2</sub> product on Cu(110).** The  
 6 possible mechanism of CO<sub>2</sub>RR mechanism to C<sub>2</sub>H<sub>4</sub> on Cu(110) surface.

7

8

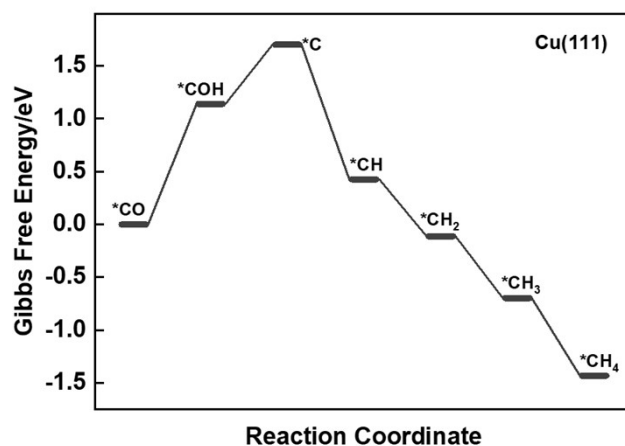

1

2 **Fig. S25. The possible mechanism of CO<sub>2</sub>RR on Cu(111).** The possible mechanism of CO<sub>2</sub>RR  
3 mechanism to CH<sub>4</sub> on Cu(111) surface and relevant Gibbs free energy of different intermediates.

4

5 **Table 1. Vibrational frequencies of stable intermediates on Cu(110) surface.**

|                      | <sup>12</sup> CO <sub>2</sub> /H <sub>2</sub> O | <sup>12</sup> CO <sub>2</sub> /D <sub>2</sub> O | <sup>13</sup> CO <sub>2</sub> /H <sub>2</sub> O |
|----------------------|-------------------------------------------------|-------------------------------------------------|-------------------------------------------------|
| *CO <sub>2</sub>     | 1698/1527/698                                   | 1669/1157/711                                   | 1665/1519/688                                   |
| *CO <sub>2</sub> H   | 1039/1705                                       | 1058/1698                                       | 1017/1696                                       |
| *COCO                | 2051                                            | -                                               | 1992                                            |
| *CH <sub>2</sub> CHO | 519                                             | 444                                             | 513                                             |
| *CO                  | 2029                                            | -                                               | 1982                                            |
| Two *CO              | 2067/1986                                       | -                                               | 2019/1941                                       |

6

7 **Table 2. Vibrational frequencies of stable intermediates on Cu(100) surface.**

|                      | <sup>12</sup> CO <sub>2</sub> /H <sub>2</sub> O | <sup>12</sup> CO <sub>2</sub> /D <sub>2</sub> O | <sup>13</sup> CO <sub>2</sub> /H <sub>2</sub> O |
|----------------------|-------------------------------------------------|-------------------------------------------------|-------------------------------------------------|
| *CO <sub>2</sub> H   | 1482/1220/1150                                  | 1458/1188/904                                   | 1448/1209/1132                                  |
| *COCO                | 2090                                            | -                                               | 2031                                            |
| *CH <sub>2</sub> CHO | 516                                             | 447                                             | 511                                             |
| *CO                  | 2027                                            | -                                               | 1981                                            |
| Two *CO              | 2066/1977                                       | -                                               | 2019/1933                                       |

8

9 **Table 3. Simulation parameters of Gibbs free energy calculated for CO<sub>2</sub>RR on Cu(110)**

1 surface (eV)

| species                           | E <sub>DFT</sub> | E <sub>ZPE</sub> | ∫C <sub>v</sub> dT | TS    | G        |
|-----------------------------------|------------------|------------------|--------------------|-------|----------|
| Cu(110)                           | -90.546          |                  |                    |       |          |
| *CO-CO                            | -121.560         | 0.406            | 0.116              | 0.222 | -121.260 |
| *OCCO                             | -121.344         | 0.409            | 0.123              | 0.245 | -121.057 |
| *CHOCO                            | -125.294         | 0.703            | 0.124              | 0.234 | -124.701 |
| *CHOCHO                           | -129.643         | 0.998            | 0.129              | 0.249 | -128.765 |
| *CH <sub>2</sub> OCHO             | -133.284         | 1.271            | 0.141              | 0.259 | -132.131 |
| *CH <sub>2</sub> OHCHO            | -136.959         | 1.630            | 0.138              | 0.250 | -135.441 |
| *CHOHCHO                          | -133.470         | 1.321            | 0.145              | 0.283 | -132.287 |
| *CHCHO                            | -121.919         | 0.877            | 0.098              | 0.176 | -121.120 |
| *CH <sub>2</sub> CHO              | -127.084         | 1.212            | 0.108              | 0.202 | -125.966 |
| *CH <sub>2</sub> CHOH             | -130.272         | 1.500            | 0.133              | 0.289 | -128.928 |
| *CH <sub>3</sub> CHO              | -130.345         | 1.474            | 0.152              | 0.340 | -129.059 |
| *CH <sub>3</sub> CHOH             | -133.816         | 1.809            | 0.133              | 0.253 | -132.127 |
| *CH <sub>2</sub> CH               | -119.049         | 1.078            | 0.084              | 0.157 | -118.044 |
| *C <sub>2</sub> H <sub>5</sub> OH | -138.310         | 2.139            | 0.160              | 0.373 | -136.384 |
| *C <sub>2</sub> H <sub>4</sub>    | -123.522         | 1.401            | 0.101              | 0.223 | -122.243 |

2

3 Table 4. Simulation parameters of Gibbs free energy calculated for CO<sub>2</sub>RR on Cu(100)

4 surface (eV)

| species | E <sub>DFT</sub> | E <sub>ZPE</sub> | ∫C <sub>v</sub> dT | TS    | G        |
|---------|------------------|------------------|--------------------|-------|----------|
| Cu(100) | -94.229          |                  |                    |       |          |
| *CO-CO  | -125.086         | 0.389            | 0.096              | 0.177 | -124.769 |
| *OCCO   | -124.827         | 0.418            | 0.119              | 0.234 | -124.524 |
| *CHOCO  | -128.652         | 0.680            | 0.137              | 0.269 | -128.104 |
| *CHOCHO | -132.968         | 1.010            | 0.123              | 0.235 | -132.070 |

|                                   |          |       |       |       |          |
|-----------------------------------|----------|-------|-------|-------|----------|
| *CH <sub>2</sub> OCHO             | -136.829 | 1.309 | 0.145 | 0.295 | -135.670 |
| *CH <sub>2</sub> OHCHO            | -140.665 | 1.658 | 0.127 | 0.230 | -139.110 |
| *CHOHCHO                          | -137.038 | 1.337 | 0.138 | 0.263 | -135.826 |
| *CHCHO                            | -126.124 | 0.924 | 0.093 | 0.167 | -125.274 |
| *CH <sub>2</sub> CHO              | -130.398 | 1.207 | 0.110 | 0.205 | -129.286 |
| *CH <sub>2</sub> CHOH             | -133.776 | 1.508 | 0.134 | 0.285 | -132.419 |
| *CH <sub>3</sub> CHO              | -133.972 | 1.465 | 0.140 | 0.351 | -132.718 |
| *CH <sub>3</sub> CHOH             | -137.458 | 1.803 | 0.141 | 0.287 | -135.801 |
| *CH <sub>2</sub> CH               | -122.659 | 1.077 | 0.088 | 0.167 | -121.661 |
| *C <sub>2</sub> H <sub>5</sub> OH | -141.958 | 2.133 | 0.160 | 0.358 | -140.023 |
| *C <sub>2</sub> H <sub>4</sub>    | -126.911 | 1.391 | 0.107 | 0.229 | -125.642 |

1

2 **Table 5. Simulation parameters of Gibbs free energy calculated for CO<sub>2</sub>RR on Cu(111)**

3 **surface (eV)**

| species         | E <sub>DFT</sub> | E <sub>ZPE</sub> | $\int C_v dT$ | TS    | G        |
|-----------------|------------------|------------------|---------------|-------|----------|
| Cu(111)         | -95.458          |                  |               |       |          |
| COH             | -113.864         | 0.465            | 0.083         | 0.156 | -113.472 |
| C               | -101.955         | 0.093            | 0.018         | 0.026 | -101.870 |
| CH              | -106.898         | 0.352            | 0.030         | 0.042 | -106.558 |
| CH <sub>2</sub> | -111.054         | 0.581            | 0.062         | 0.103 | -110.514 |
| CH <sub>3</sub> | -115.335         | 0.909            | 0.063         | 0.153 | -114.516 |
| CH <sub>4</sub> | -119.769         | 1.194            | 0.063         | 0.154 | -118.666 |

4

1 **Supplementary References**

2

- 3 (1) Klaas Jan P. Schouten, Elena Pérez Gallent & Marc T.M. Koper. (2013). The electrochemical  
4 characterization of copper single-crystal electrodes in alkaline media. *J. Electroanal. Chem.* 699, 6-  
5 9.
